# Supplementary material for: Quantifying electrochemical losses in perovskite solar cells
Source: Royal Society of Chemistry journal article supplement (doi:10.1039/d2tc03486g), 2023-01-01
Supplement: d2tc03486g1.pdf [file d2tc03486g1.pdf]

## Supporting information

# Quantifying Electrochemical Losses in Perovskite Solar cells

**Tulus,<sup>a,b</sup> Junke Wang,<sup>c</sup> Yulia Galagan,<sup>c,d</sup> and Elizabeth von Hauff<sup>a,e,f,\*</sup>**

a. Physics of Energy, Department of Physics & Astronomy, Faculty of Sciences, Vrije Universiteit Amsterdam, 1081 HV Amsterdam, The Netherlands

b. Research Center for Advanced Materials, National Research & Innovation Agency (BRIN), Jakarta 10340, Indonesia

c. TNO - Solliance, 5656 AE Eindhoven, The Netherlands

d. National Taiwan University, Department of Materials Science and Engineering, Taipei 106, Taiwan

e. Fraunhofer Institute for Organic Electronics, Electron Beam and Plasma Technology (FEP), Dresden, Germany

f. Faculty of Electrical and Computer Engineering, Technical University of Dresden, Dresden, Germany

### Corresponding Author

\*E-mail: [elizabeth.von\\_hauff@tu-dresden.de](mailto:elizabeth.von_hauff@tu-dresden.de)

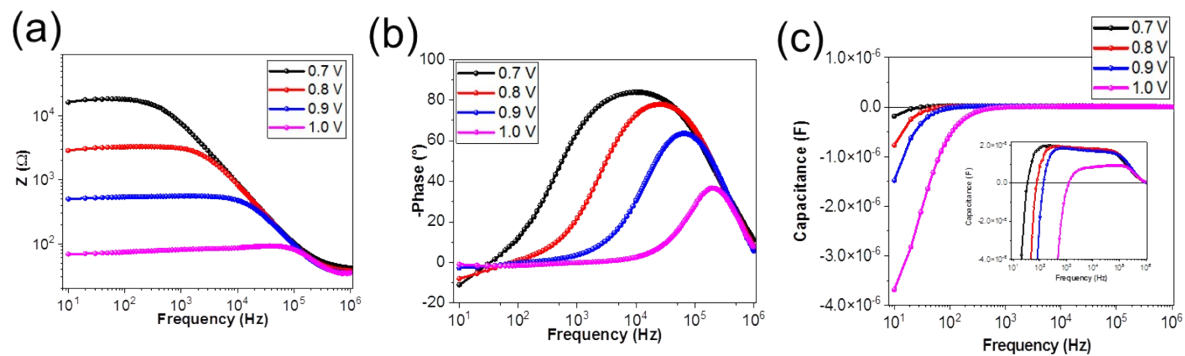

**Figure S1.** (a) The  $Z$  versus frequency; (b) the phase versus frequency; (c) the capacitance versus frequency, where the inset shows the negative capacitance in the low frequency regime in the dark at DC biases of 0.7 V, 0.8 V, 0.9 V, and 1.0 V, respectively.

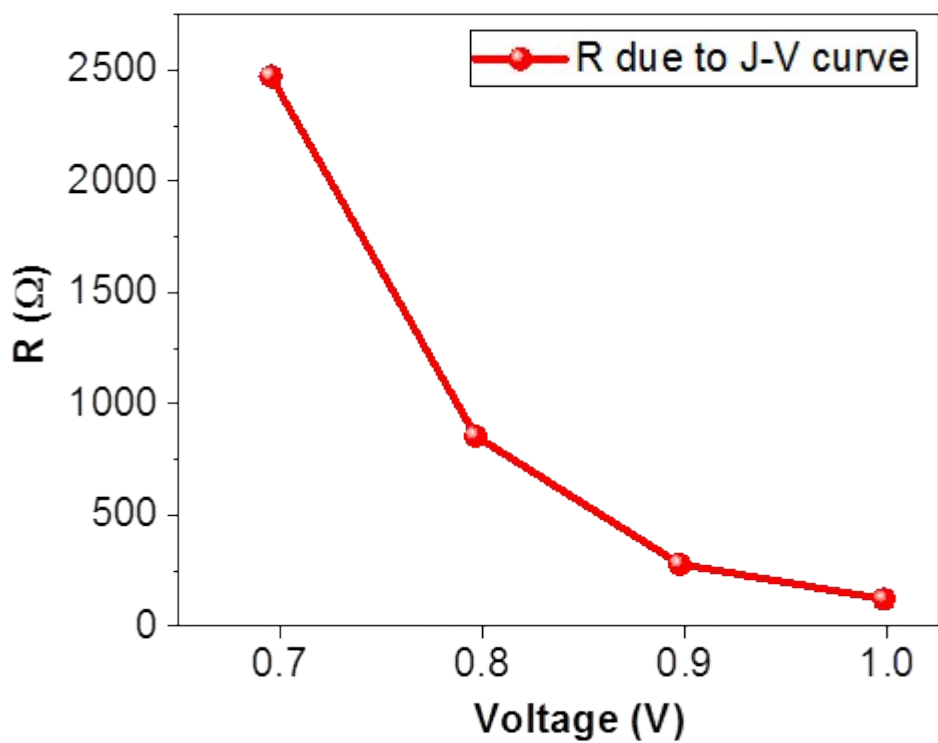

**Figure S2.** Plot  $R$  from the J-V curve versus voltage.

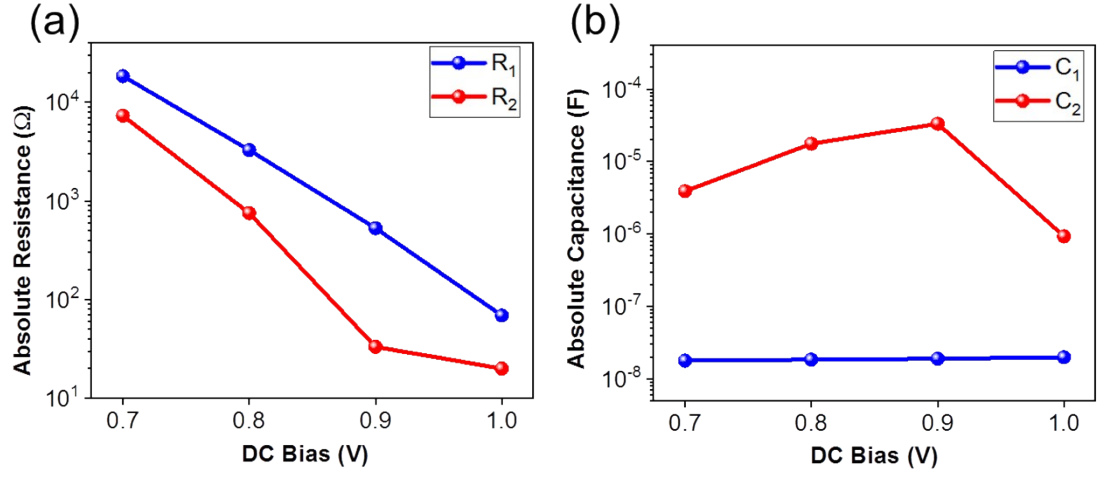

**Figure S3.** (a) Plot  $R_1$ ,  $R_2$  from ECM versus applied external voltage, (b) Plot  $C_1$ ,  $C_2$  from ECM versus applied external voltage.

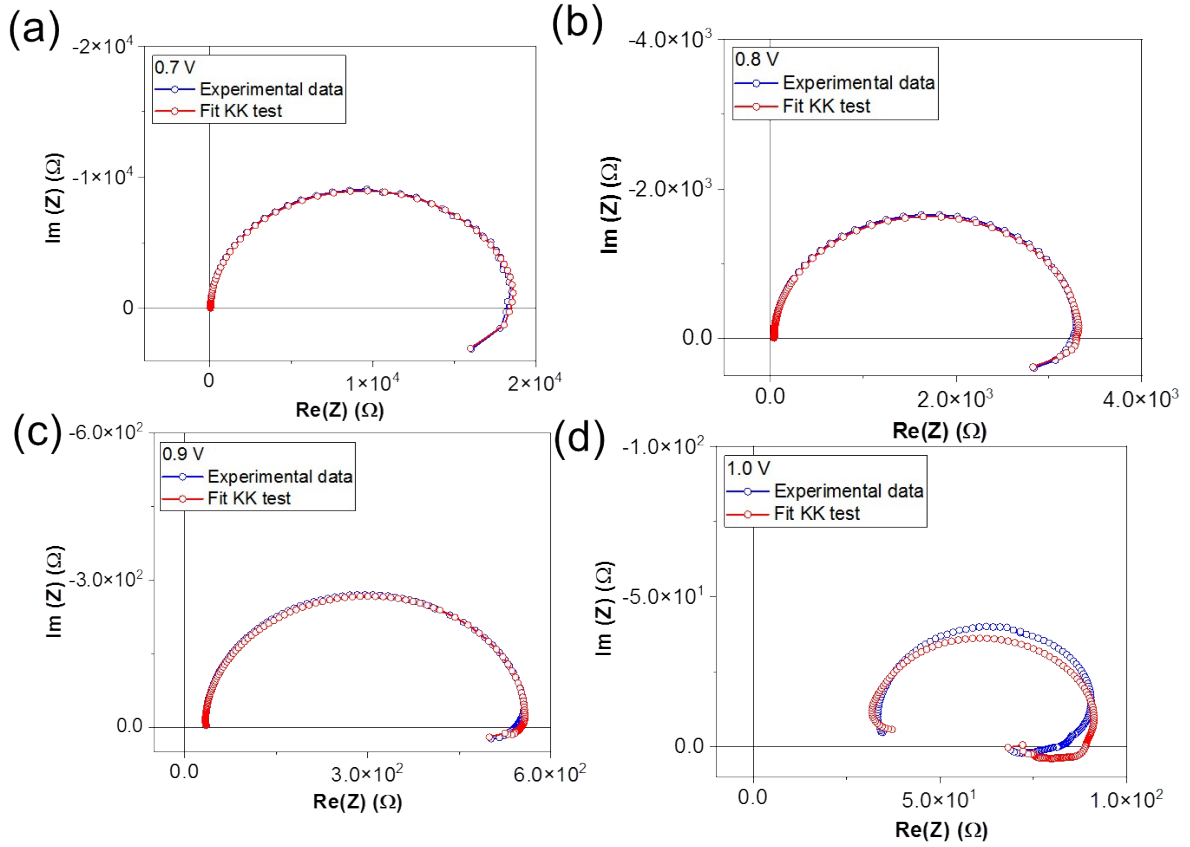

**Figure S4.** The Nyquist plot of the experimental data (blue) as well as the fit (red) from the KK check using 20 RC elements with ratio data point of 0.13 in the dark at DC bias of, (a) 0.7 V, (b) 0.8 V, (c) 0.9 V, and (d) 1.0 V, respectively.

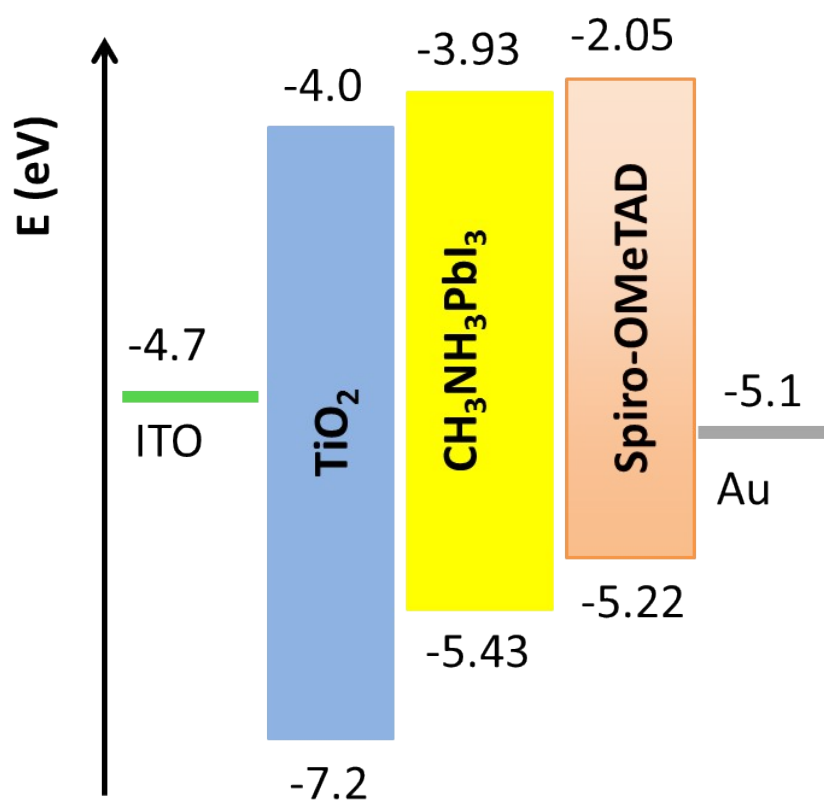

**Figure S5.** Depicts the energy band diagram of the device.<sup>1,2</sup>

## REFERENCES

- 1 H.S. Kim, C.R. Lee, J.H. Im, K.B. Lee, T. Moeh, A. Marchioro, S.J. Moon, R.H. Baker, J.H. Yum, J.E. Moser, M. Gratzel and N.G. Park, *Scientific Reports*, 2012, **2** (591),1-7.
- 2 W.J. Scheideler, N. Rolston, O. Zhao, J. Zhang and R.H. Dauskardt, *Adv. Energy Mater.*, 2019, **1803600**, 1-8.
